# Supplementary material for: Appraisal on the wound healing potential of Melaleuca alternifolia and Rosmarinus officinalis L. essential oil-loaded chitosan topical preparations
Source: PubMed Central journal article supplement (PMC6746351; doi:10.1371/journal.pone.0219561), 2019-09-16
Supplement: pone.0219561.s001.pdf [file pone.0219561.s001.pdf]

<< Target >>

Line#:1 R.Time:7.435(Scan#:888) Retention Index:918 MassPeaks:253

RawMode:Averaged 7.430-7.440(887-889) BasePeak:93.00(8122)

BG Mode:Calc. from Peak Group 1 - Event 1 Scan

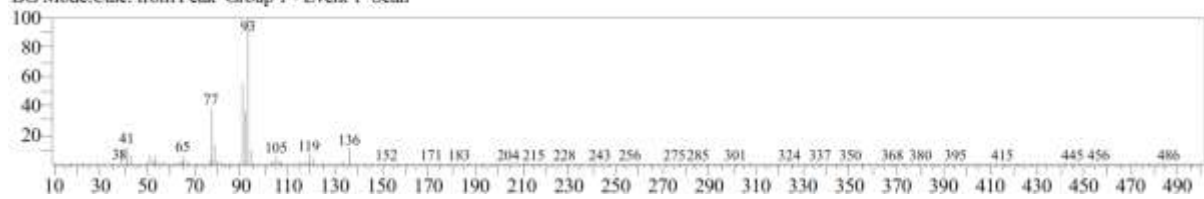

**S1 Fig. EI/MS spectrum of compound (1) identified as  $\alpha$ -Thujene in the essential oil of *M. alternifolia***
