# Supplementary material for: Appraisal on the wound healing potential of Melaleuca alternifolia and Rosmarinus officinalis L. essential oil-loaded chitosan topical preparations
Source: PubMed Central journal article supplement (PMC6746351; doi:10.1371/journal.pone.0219561), 2019-09-16
Supplement: pone.0219561.s002.pdf [file pone.0219561.s002.pdf]

<< Target >>  
Line#:2 R.Time:7.630(Scan#:927) Retention Index:925 MassPeaks:298  
RawMode:Averaged 7.625-7.635(926-928) BasePeak:93.00(21413)  
BG Mode:Calc. from Peak Group 1 - Event 1 Scan

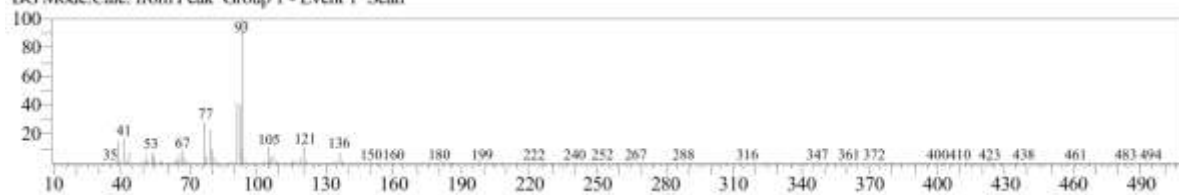

**S2 Fig. EI/MS spectrum of compound (2) identified as  $\alpha$ -Pinene in the essential oils of *M. alternifolia* and *R. officinalis***
