# Supplementary material for: Appraisal on the wound healing potential of Melaleuca alternifolia and Rosmarinus officinalis L. essential oil-loaded chitosan topical preparations
Source: PubMed Central journal article supplement (PMC6746351; doi:10.1371/journal.pone.0219561), 2019-09-16
Supplement: pone.0219561.s003.pdf [file pone.0219561.s003.pdf]

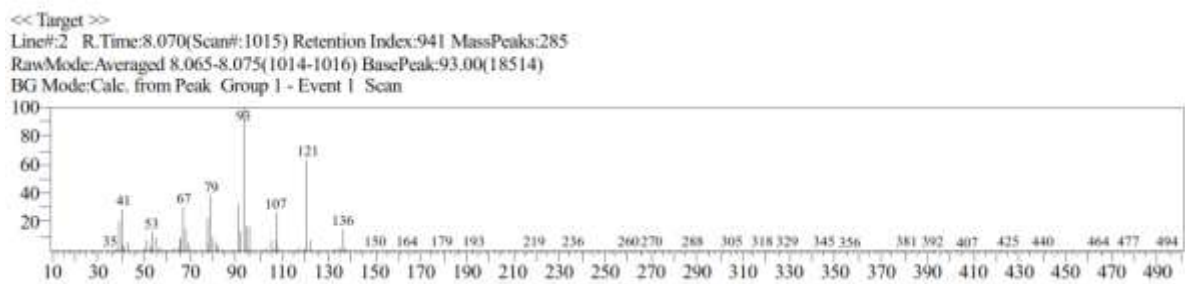

**S3 Fig. EI/MS spectrum of compound (3) identified as Camphene in the essential oil of *R. officinalis***
