# Supplementary material for: Appraisal on the wound healing potential of Melaleuca alternifolia and Rosmarinus officinalis L. essential oil-loaded chitosan topical preparations
Source: PubMed Central journal article supplement (PMC6746351; doi:10.1371/journal.pone.0219561), 2019-09-16
Supplement: pone.0219561.s005.pdf [file pone.0219561.s005.pdf]

<< Target >>

Line#:4 R.Time:9.385(Scan#:1278) Retention Index:989 MassPeaks:288

RawMode:Averaged 9.380-9.390(1277-1279) BasePeak:41.00(4209)

BG Mode:Calc. from Peak Group 1 - Event 1 Scan

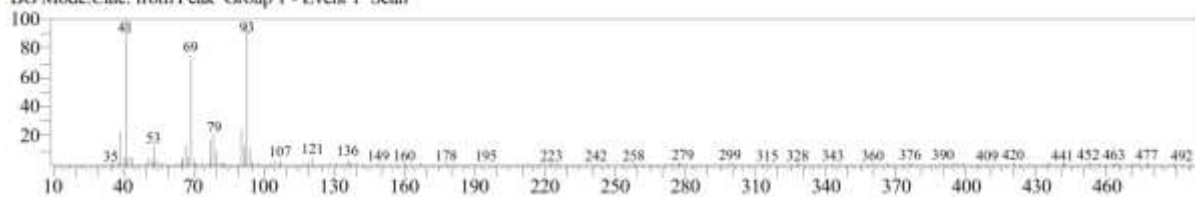

**S5 Fig. EI/MS spectrum of compound (5) identified as  $\beta$ -Myrcene in the essential oils of *M. alternifolia* and *R. officinalis***
