# Supplementary material for: Appraisal on the wound healing potential of Melaleuca alternifolia and Rosmarinus officinalis L. essential oil-loaded chitosan topical preparations
Source: PubMed Central journal article supplement (PMC6746351; doi:10.1371/journal.pone.0219561), 2019-09-16
Supplement: pone.0219561.s006.pdf [file pone.0219561.s006.pdf]

<< Target >>

Line#:5 R.Time:9.785(Scan#:1358) Retention Index:1003 MassPeaks:245

RawMode:Averaged 9.780-9.790(1357-1359) BasePeak:93.00(3295)

BG Mode:Calc. from Peak Group 1 - Event 1 Scan

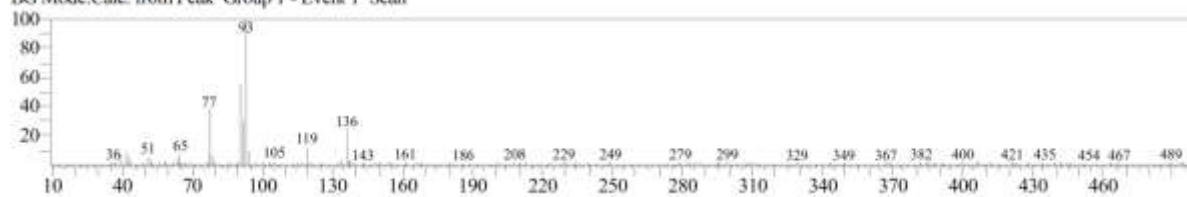

**S6 Fig. EI/MS spectrum of compound (6) identified as  $\alpha$ -Phellandrene in the essential oil of *M. alternifolia***
