# Supplementary material for: Appraisal on the wound healing potential of Melaleuca alternifolia and Rosmarinus officinalis L. essential oil-loaded chitosan topical preparations
Source: PubMed Central journal article supplement (PMC6746351; doi:10.1371/journal.pone.0219561), 2019-09-16
Supplement: pone.0219561.s007.pdf [file pone.0219561.s007.pdf]

<< Target >>

Line#:6 R.Time:10.170(Scan#:1435) Retention Index:1015 MassPeaks:280

RawMode:Averaged 10.165-10.175(1434-1436) BasePeak:121.00(58072)

BG Mode:Calc. from Peak Group 1 - Event 1 Scan

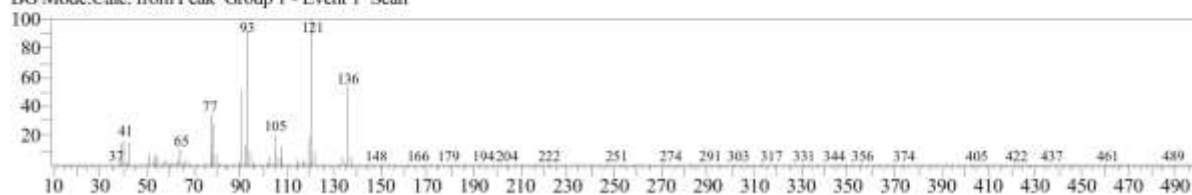

**S7 Fig. EI/MS spectrum of compound (7) identified as  $\alpha$ -Terpinene in the essential oil of *M. alternifolia***
