# Supplementary material for: Appraisal on the wound healing potential of Melaleuca alternifolia and Rosmarinus officinalis L. essential oil-loaded chitosan topical preparations
Source: PubMed Central journal article supplement (PMC6746351; doi:10.1371/journal.pone.0219561), 2019-09-16
Supplement: pone.0219561.s009.pdf [file pone.0219561.s009.pdf]

<< Target >>  
Line#:6 R.Time:10.555(Scan#:1512) Retention Index:1027 MassPeaks:315  
RawMode:Averaged 10.550-10.560(1511-1513) BasePeak:68.00(11024)  
BG Mode:Calc. from Peak Group 1 - Event 1 Scan

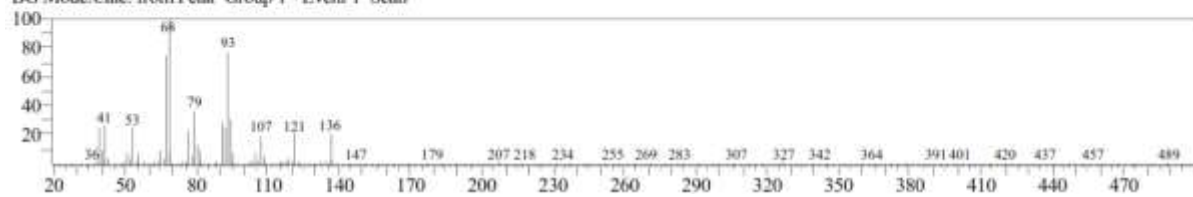

**S9 Fig. EI/MS spectrum of compound (9) identified as *D*-Limonene in the essential oil of *R. officinalis***
