# Supplementary material for: Appraisal on the wound healing potential of Melaleuca alternifolia and Rosmarinus officinalis L. essential oil-loaded chitosan topical preparations
Source: PubMed Central journal article supplement (PMC6746351; doi:10.1371/journal.pone.0219561), 2019-09-16
Supplement: pone.0219561.s011.pdf [file pone.0219561.s011.pdf]

<< Target >>

Line#:9 R.Time:10.645(Scan#:1530) Retention Index:1030 MassPeaks:290

RawMode:Averaged 10.640-10.650(1529-1531) BasePeak:42.95(11681)

BG Mode:Calc. from Peak Group 1 - Event 1 Scan

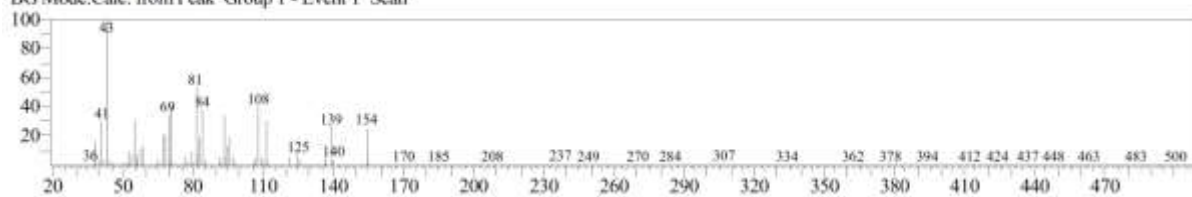

**S11 Fig. EI/MS spectrum of compound (11) identified as 1,8-Cineole in the essential oils of *M. alternifolia* and *R. officinalis***
