# Supplementary material for: Appraisal on the wound healing potential of Melaleuca alternifolia and Rosmarinus officinalis L. essential oil-loaded chitosan topical preparations
Source: PubMed Central journal article supplement (PMC6746351; doi:10.1371/journal.pone.0219561), 2019-09-16
Supplement: pone.0219561.s012.pdf [file pone.0219561.s012.pdf]

<< Target >>  
Line#:10 R.Time:11.510(Scan#:1703) Retention Index:1058 MassPeaks:304  
RawMode:Averaged 11.505-11.515(1702-1704) BasePeak:93.00(160334)  
BG Mode:Calc. from Peak Group 1 - Event 1 Scan

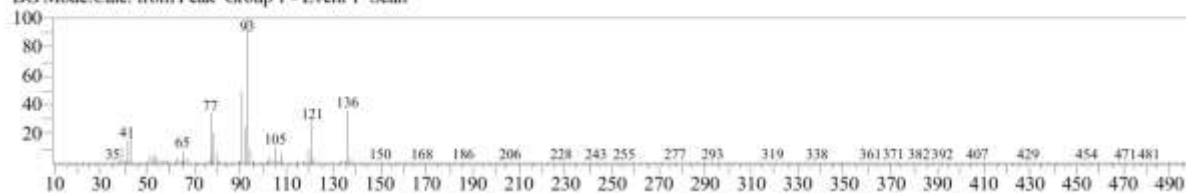

**S12 Fig. EI/MS spectrum of compound (12) identified as  $\gamma$ -Terpinene in the essential oil of *M. alternifolia***
