# Supplementary material for: Appraisal on the wound healing potential of Melaleuca alternifolia and Rosmarinus officinalis L. essential oil-loaded chitosan topical preparations
Source: PubMed Central journal article supplement (PMC6746351; doi:10.1371/journal.pone.0219561), 2019-09-16
Supplement: pone.0219561.s013.pdf [file pone.0219561.s013.pdf]

<< Target >>

Line#:11 R.Time:12.445(Scan#:1890) Retention Index:1088 MassPeaks:270

RawMode:Averaged 12.440-12.450(1889-1891) BasePeak:93.00(15455)

BG Mode:Calc. from Peak Group 1 - Event 1 Scan

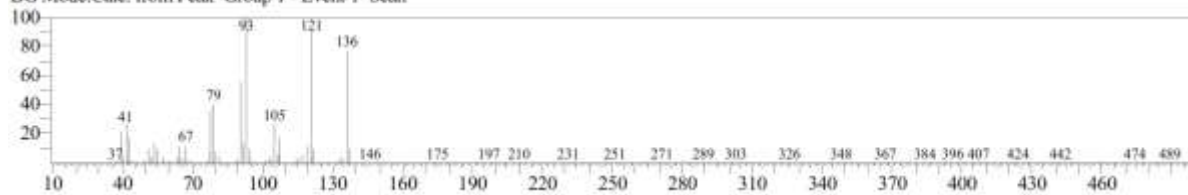

**S13 Fig. EI/MS spectrum of compound (13) identified as Terpinolene in the essential oil of *M. alternifolia***
