# Supplementary material for: Appraisal on the wound healing potential of Melaleuca alternifolia and Rosmarinus officinalis L. essential oil-loaded chitosan topical preparations
Source: PubMed Central journal article supplement (PMC6746351; doi:10.1371/journal.pone.0219561), 2019-09-16
Supplement: pone.0219561.s014.pdf [file pone.0219561.s014.pdf]

<< Target >>  
Line#:8 R.Time:12.810(Scan#:1963) Retention Index:1100 MassPeaks:267  
RawMode:Averaged 12.805-12.815(1962-1964) BasePeak:93.00(3130)  
BG Mode:Calc. from Peak Group 1 - Event 1 Scan

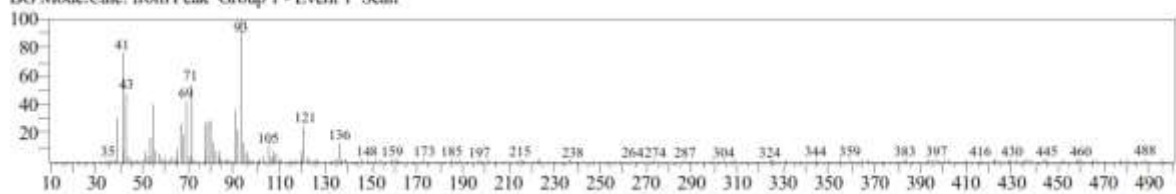

**S14 Fig. EI/MS spectrum of compound (14) identified as Linalool in the essential oil of *R. officinalis***
