# Supplementary material for: Appraisal on the wound healing potential of Melaleuca alternifolia and Rosmarinus officinalis L. essential oil-loaded chitosan topical preparations
Source: PubMed Central journal article supplement (PMC6746351; doi:10.1371/journal.pone.0219561), 2019-09-16
Supplement: pone.0219561.s015.pdf [file pone.0219561.s015.pdf]

<< Target >>  
Line#9 R.Time:14.240(Scan#:2249) Retention Index:1146 MassPeaks:208  
RawMode:Averaged 14.235-14.245(2248-2250) BasePeak:95.05(38880)  
BG Mode:Calc. from Peak Group 1 - Event 1 Scan

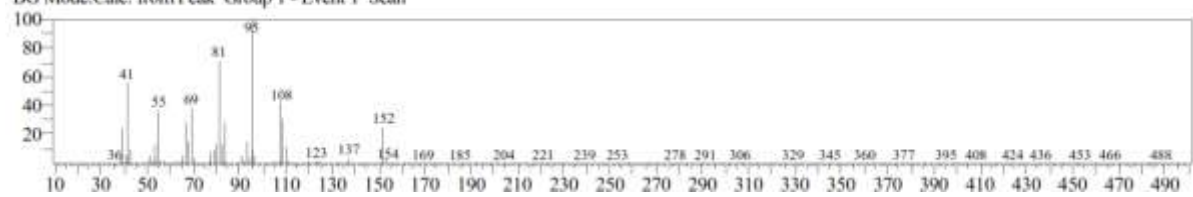

**S15 Fig. EI/MS spectrum of compound (15) identified as Camphor in the essential oil of *R. officinalis***
