# Supplementary material for: Appraisal on the wound healing potential of Melaleuca alternifolia and Rosmarinus officinalis L. essential oil-loaded chitosan topical preparations
Source: PubMed Central journal article supplement (PMC6746351; doi:10.1371/journal.pone.0219561), 2019-09-16
Supplement: pone.0219561.s016.pdf [file pone.0219561.s016.pdf]

<< Target >>  
Line#:10 R.Time:14.915(Scan#:2384) Retention Index:1167 MassPeaks:289  
RawMode:Averaged 14.910-14.920(2383-2385) BasePeak:95.00(14276)  
BG Mode:Calc. from Peak Group 1 - Event 1 Scan

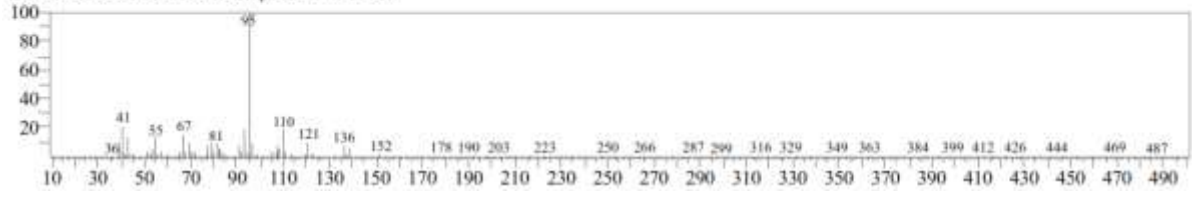

**S16 Fig. EI/MS spectrum of compound (16) identified as Borneol in the essential oil of *R. officinalis***
