# Supplementary material for: Appraisal on the wound healing potential of Melaleuca alternifolia and Rosmarinus officinalis L. essential oil-loaded chitosan topical preparations
Source: PubMed Central journal article supplement (PMC6746351; doi:10.1371/journal.pone.0219561), 2019-09-16
Supplement: pone.0219561.s017.pdf [file pone.0219561.s017.pdf]

<< Target >>

Line#:12 R.Time:15.260(Scan#:2453) Retention Index:1179 MassPeaks:321

RawMode:Averaged 15.255-15.265(2452-2454) BasePeak:71.00(175559)

BG Mode:Calc. from Peak Group 1 - Event 1 Scan

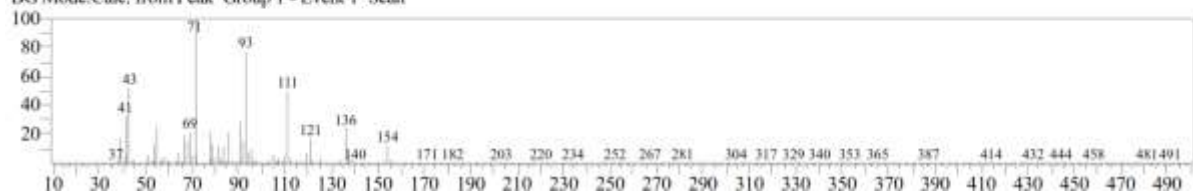

**S17 Fig. EI/MS spectrum of compound (17) identified as Terpinen-4-ol in the essential oil of *M. alternifolia***
