# Supplementary material for: Appraisal on the wound healing potential of Melaleuca alternifolia and Rosmarinus officinalis L. essential oil-loaded chitosan topical preparations
Source: PubMed Central journal article supplement (PMC6746351; doi:10.1371/journal.pone.0219561), 2019-09-16
Supplement: pone.0219561.s018.pdf [file pone.0219561.s018.pdf]

<< Target >>

Line#:13 R.Time:15.665(Scan#:2534) Retention Index:1192 MassPeaks:321

RawMode:Averaged 15.660-15.670(2533-2535) BasePeak:59.00(10146)

BG Mode:Calc. from Peak Group 1 - Event 1 Scan

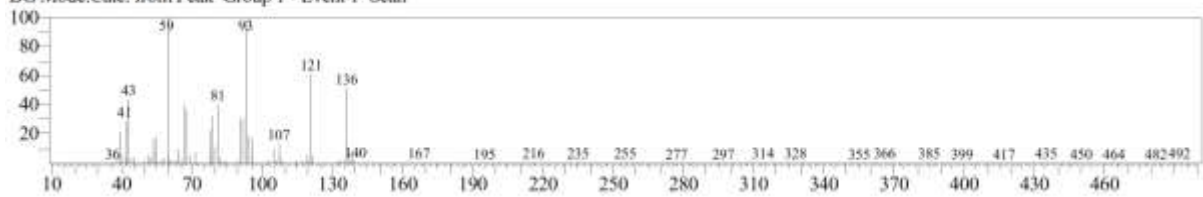

**S18 Fig.** EI/MS spectrum of compound (18) identified as  $\alpha$ -Terpineol in the essential oils of *M. alternifolia* and *R. officinalis*
