# Supplementary material for: Appraisal on the wound healing potential of Melaleuca alternifolia and Rosmarinus officinalis L. essential oil-loaded chitosan topical preparations
Source: PubMed Central journal article supplement (PMC6746351; doi:10.1371/journal.pone.0219561), 2019-09-16
Supplement: pone.0219561.s019.pdf [file pone.0219561.s019.pdf]

<< Target >>  
Line#:12 R.Time:22.275(Scan#:3856) Retention Index:1424 MassPeaks:292  
RawMode:Averaged 22.270-22.280(3855-3857) BasePeak:41.00(4469)  
BG Mode:Calc. from Peak Group 1 - Event 1 Scan

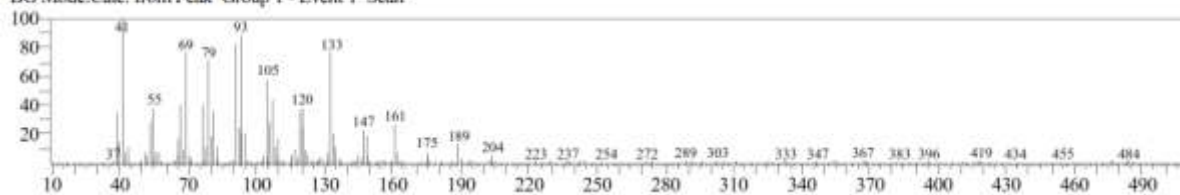

**S19 Fig. EI/MS spectrum of compound (19) identified as Caryophyllene in the essential oil of *R. officinalis***
