# Supplementary material for: Appraisal on the wound healing potential of Melaleuca alternifolia and Rosmarinus officinalis L. essential oil-loaded chitosan topical preparations
Source: PubMed Central journal article supplement (PMC6746351; doi:10.1371/journal.pone.0219561), 2019-09-16
Supplement: pone.0219561.s020.pdf [file pone.0219561.s020.pdf]

<< Target >>

Line#:14 R.Time:22.800(Scan#:3961) Retention Index:1445 MassPeaks:268

RawMode:Averaged 22.795-22.805(3960-3962) BasePeak:41.00(1482)

BG Mode:Calc. from Peak Group 1 - Event 1 Scan

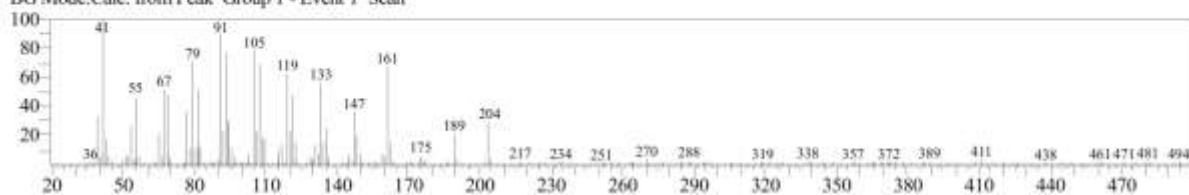

**S20 Fig. EI/MS spectrum of compound (20) identified as Alloaromadendrene in the essential oil of *M. alternifolia***
