# Supplementary material for: Appraisal on the wound healing potential of Melaleuca alternifolia and Rosmarinus officinalis L. essential oil-loaded chitosan topical preparations
Source: PubMed Central journal article supplement (PMC6746351; doi:10.1371/journal.pone.0219561), 2019-09-16
Supplement: pone.0219561.s021.pdf [file pone.0219561.s021.pdf]

<< Target >>

Line#:15 R.Time:24.275(Scan#:4256) Retention Index:1503 MassPeaks:258

RawMode:Averaged 24.270-24.280(4255-4257) BasePeak:107.00(1274)

BG Mode:Calc. from Peak Group 1 - Event 1 Scan

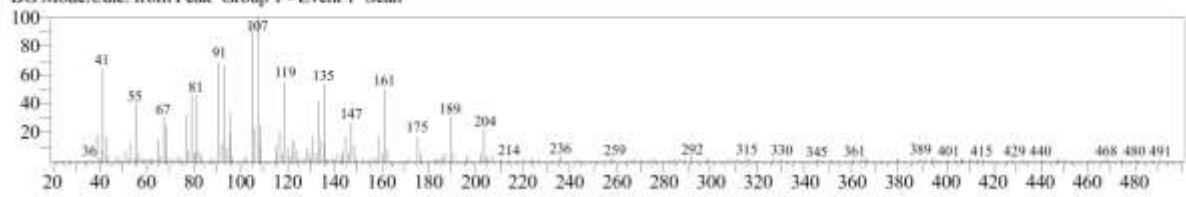

**S21 Fig. EI/MS spectrum of compound (21) identified as Ledene in the essential oil of *M. alternifolia***
