# Supplementary material for: Appraisal on the wound healing potential of Melaleuca alternifolia and Rosmarinus officinalis L. essential oil-loaded chitosan topical preparations
Source: PubMed Central journal article supplement (PMC6746351; doi:10.1371/journal.pone.0219561), 2019-09-16
Supplement: pone.0219561.s022.pdf [file pone.0219561.s022.pdf]

<< Target >>

Line#:16 R.Time:24.965(Scan#:4394) Retention Index:1530 MassPeaks:314

RawMode:Averaged 24.960-24.970(4393-4395) BasePeak:161.05(2286)

BG Mode:Calc. from Peak Group 1 - Event 1 Scan

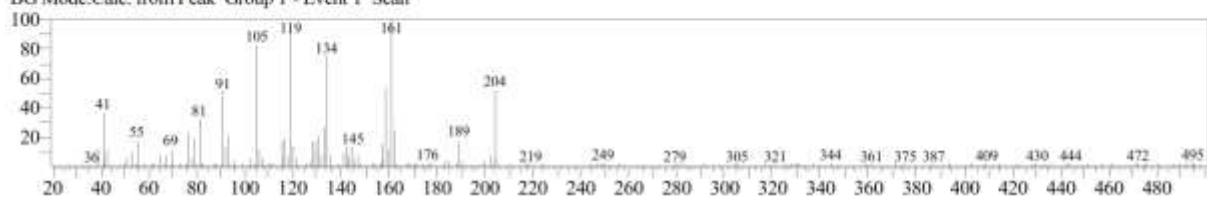

**S22 Fig. EI/MS spectrum of compound (22) identified as  $\delta$ -Cadinene in the essential oil of *M. alternifolia***
